# Supplementary material for: Building resilience for future adversity: a systematic review of interventions in non-clinical samples of adults
Source: BMC Psychiatry. 2014 Aug 14;14:227. doi: 10.1186/s12888-014-0227-6 (PMC4149241; doi:10.1186/s12888-014-0227-6)
Supplement: Additional file 1: — Description of selected studies. [file 12888_2014_227_MOESM1_ESM.xlsx]

## Sheet: Table 1 BMC 2006
Study	Purpose	Design	N	Participants	Demographic Age (mean) % of women	Intervention	Scales	Results
Maddi et al, 1998	Compare the effect of hardiness training with two other conditions: relaxation/meditation and passive listening. Hardiness involves the interrelation of self-perceptions of commitment, control and challenge that help in managing stressful circumstances so as to turn them into developmental rather than debilitating experiences.	RCT	46 (Hardiness n = 18, Relaxation/Meditation n = 12, Passive Listening n = 16)	Business managers	Not Presented 40%	Hardiness training or Relaxation/Meditation, being 10 sessions of 90 minutes, with an interval of 1 week between each session.	PVS, HSC, SIS, measure of job satisfaction and four scales developed to measure social support.	The training in hardiness was more effective than the other two, with increases in hardiness, job satisfaction and social support and decreases in self-reported stress and severity of diseases. Although statistically significant, the differences in the results were small.
Waite et al, 2003	Evaluate the efficacy of the "Personal Resilience and Resilient Relationships" Program, a resilience training in three aspects, namely: resilience and reintegration; self-esteem, locus of control, purpose in life and interpersonal relationships; and finally, satisfaction with work.	RCT	232 (experimental group n=123, control group n=109).	Employees of a large public company in Utah	93% from 18 - 49 (experimental group) 82% from 18-49 (control group) 84% in both groups	Resilience Training conducted on five different days, lasting seven hours each (total = 35 hours).	SCS, RSES, Internal subscale of MLCS, PILT, a portion of HPLP II, SURVEY2000 NTEU-IRS Employee Satisfaction.	In the resilience training group a statistically significant improvement was observed on all scales, except in relation to job satisfaction. The evaluators found few differences between the post-test and follow-up results, except for the variable Locus of Control, whose scores decreased.
Cohn et al, 2007	Evaluate the efficacy of a brief cognitive-behavioral program to increase psychological resilience through modification of causal attributions, expectations of control, coping strategies and psychological adjustment.	RCT	174 (experimental group n = 101 or control group (n = 73)	Soldiers	Not presented 22% (experimental group) 14% (control group)	Intervention with the following techniques: psychoeducation, cognitive restructuring, and coping strategies, being two 40-minute sessions conducted by a psychologist. The control group participated in a group discussion	A modified version of the REASQ, Brief COPE, GHQ-12, PSOM.	As regards the PSOM, the control group showed a significant decrease at the second evaluation, a result that remained during follow-up. In the intervention group, although no statistically significant increase occurred in positive states after the intervention, there was a significant increase in the follow-up period. According to the GHQ-12, in the control group there was no statistically signif…
Steinhardt et al, 2008	Observe the effectiveness of an intervention to increase resilience, coping strategies, and protective factors and to decrease symptoms during the period of increased academic stress.	RCT	57 (experimental group n = 30, control group - waiting list n = 27)	University students	21 82%	Program Transforming Lives through Resilience divided into 4 sessions of 2 hours each	DRS, CD-RISC, Brief COPE, LOT-R, amended version of the PANAS, which consists of the original scale plus nine items, RSES, SLS, CES-D, PSS, Symptoms Checklist.	The experimental group obtained significantly higher scores than the waiting list group as regards resilience, and significantly lower results on avoidant coping and higher scores on problem solving coping as compared to the waiting list group. The experimental group also had significantly higher scores on self-esteem, self-leadership and positive affect and lower scores on depressive symptoms, n…
Luthans et al, 2008	Increase the participants' psychological capital. Psychological capital (Psy-Cap) is defined as "state of positive psychological development of an individual” and includes self-efficacy, optimism, hope and resilience.	RCT	364 (experimental group n=187, control group n=177)	Industrial workers	32,2 Not presented	PsyCap intervention divided into two sessions of 45 min each, with one week interval between them. The control group, on the other hand, was given an exercise in decision-making, led by the same facilitator, with similar methods.	PCQ	The treatment group showed a small but significant increase in their psychological capital as compared to the control group.
Abbott et al, 2009	Increase resilience by teaching skills to help improve the ability to deal with challenges and setbacks and maximize the earning potential.	RCT	53 (experimental group n = 27, control group - waiting list n = 26)	Australian sales managers	40.50 ± 9.45 (experimental group) 46.00 ± 9.99 (control group) 15,4% (experimental group) 11,1% (control group)	The intervention, in group format, lasted 10 weeks. The authors did not report the length of intervention sessions.	AHI, WHOQOL- BREF, DASS-21.	No significant differences were found between the groups in relation to depression, anxiety, stress or quality of life. On the other hand, both groups reported being happier 10 weeks after the beginning of the evaluation. Nevertheless, there were no significant differences between the groups in relation to happiness (measured by AHI) and job performance.
Sood et al, 2010	Increase resilience and quality of life and decrease stress and anxiety.	RCT	40 (experimental group n = 20, control group - waiting list n = 20)	Physicians of the Department of Medicine of a tertiary care hospital	46.8 ± 8.3 years (experimental group) 50.2 ± 5.7 (control group) 45% (experimental group) 50% (control group)	The SMART program was adapted from "Attention and Interpretation Therapy", Training in brief structured relaxation and diaphragmatic breathing was also provided to participants. The intervention consisted of a single 90-minute session.	CD-RISC, PSS, SAS, LASA, VAS-Fatigue.	There was a significant increase in resilience scores measured by CD-RISC. A significant improvement was also found in perceived stress, anxiety and quality of life in the intervention group as compared to the control group.
Millear et al, 2008	Aimed at developing resilience in the workplace.	NRCT	71 (experimental group n = 20, control group n = 51)	Employees of a company.	35.4 ± 9.2 (experimental group) 37.11 ± 10.9 (control group) Not Presented	Promoting Adult Resilience Program in one-hour sessions over 11 weeks. The control group received no training.	DASS-21, SWLS, Ryff's Scales of Psychological Well-Being, CSE and Social Skills Scale.	Stress levels were significantly lower in the PAR group than in the control group at the end of the intervention and at follow-up, and at follow-up scores decreased even further. The PAR group reported significantly greater coping self-efficacy at the end of the intervention and the outcome remained at follow-up. The PAR group had significantly lower scores of depression and anxiety than the cont…
Liossis et al, 2009	Increase resilience, well-being and mental health in the workforce.	NRCT	126 (experimental group n = 28, control group n = 98)	Customer service professionals of a government organization	39.4 ± 2.3 (experimental group) 39.29 ± 11.43 (control group) 84% (experimental group) 76% (control group)	The second pilot administration of the PAR Program consisted of 7 sessions of 90 minutes over 11 weeks (not 60 minutes as in the first pilot administration).	DASS-21, MBI-GS, Ryff's Scales of Psychological Well-Being, CSE, LOT-R, Work Vigour subscale from the Utrecht Work Engagement scale, WFSS.	Participants reported significant improvement in their levels of coping self-efficacy, satisfaction with their families and their work-life balance, with better fit between their work and family demands and decreases in the negative spillover from family to work roles. During follow-up, although there was a difference, it was not significant for these measures. The PAR group participants also rep…
Maddi et al, 2009	Analyze the effectiveness of hardiness training.	NRCT	727 (experimental group n= 349, control group n= 378)	Students at the University of California	22.27 (experimental group) 21.68 (control group) 80.80% (experimental group) 77.80% (control group)	Training in Hardiness lasting 11 weeks.	HardiSurvey III-R	There were no significant differences between the groups in relation to gender, ethnicity, transfer status or years of study at the university. The two groups did not differ significantly in terms of attitudes and skills in hardiness or academic performance.
Anitei et al, 2011	Evaluate the improvement of resilience in relation to stress gained through working groups in integrative psychotherapy.	NRCT	83 (divided into an experimental and a non-experimental group)	Bank employees	40.27 ± 4.39 Not presented	The former underwent six sessions of psychotherapy, all of them including relaxation and cognitive techniques for stress management.	SROS	After the intervention, the experimental group showed some statistically significant differences as compared to the non-experimental group. These were: reduction in relation to occupational stressors, greater tolerance and greater sense of self-efficacy.
Lester et al, 2011	Increase resilience and psychological health (R\PH) of American soldiers.	NRCT	22,008 (experimental group n= 12,529, control group n= 9479)	U.S. Soldiers	Not presented Not presented	9,479 Soldiers in units that did not receive an MRT trainer (Control condition), while 9 Soldiers were in units with an MRT (Treatment condition).	GAT	Only 9,957 completed it. The treatment group had significantly higher rates of growth in resilience and psychological health than the control group on all subscales used. However, the effect size was small.
Burton et al, 2010	Promote well-being in the workplace.	Open Trial	16	Employees of The University of Queensland.	36.5 ± 8.6 17%	Program READY in 11 sessions of two hours each.The intervention approach is based on Acceptance and Commitment Therapy.	Ryff's Scales of Psychological Well-Being, CES-D, Short Version of the DASS-21, PANAS-X, Action consistency items from The Valued Living Questionnaire, AAQ II, MOS Social Support Survey.	The levels of acceptance, mastery, positive emotions, attention, personal growth and autonomy increased, and the levels of stress and depression decreased significantly. Cholesterol was the only aspect with little statistical effect. The difference in the depression measure had borderline significance on CES-D and no significant difference on DASS-21. No significant differences were found in cort…
Legend: RCT (Randomized Controlled Trial); NRCT (Non-Randomized Controlled Trial); PVS (Personal Views Survey); HSC (Hopkins Symptom Checklist); SIS (Seriousness of Illness Survey); SCS (Spirit Core Scale); RSES (Rosenberg Self-Esteem Scale); MLCS (Multidimentional Locus of Control Scale); PILT (Purpose in Life Test); HPLP II (Health Promoting Lifestyle Profile II); REASQ (Real Events Attribution…
